# Supplementary material for: Change in molecular shapes of the trinuclear CuII2ZnII complexes on Schiff base reduction: structural and theoretical investigations
Source: Royal Society of Chemistry journal article supplement (doi:10.1039/d1ce00490e), 2021-01-01
Supplement: d1ce00490e1.pdf [file d1ce00490e1.pdf]

## Supporting Information

### Change in molecular shapes of the trinuclear $\text{Cu}^{\text{II}}_2\text{Zn}^{\text{II}}$ complexes on Schiff base reduction: Structural and theoretical investigations

Alokesh Hazari,<sup>a,b</sup> Rosa M. Gomila,<sup>c</sup> Antonio Frontera<sup>d</sup>, Michael G. B. Drew<sup>e</sup> and Ashutosh Ghosh<sup>a\*</sup>

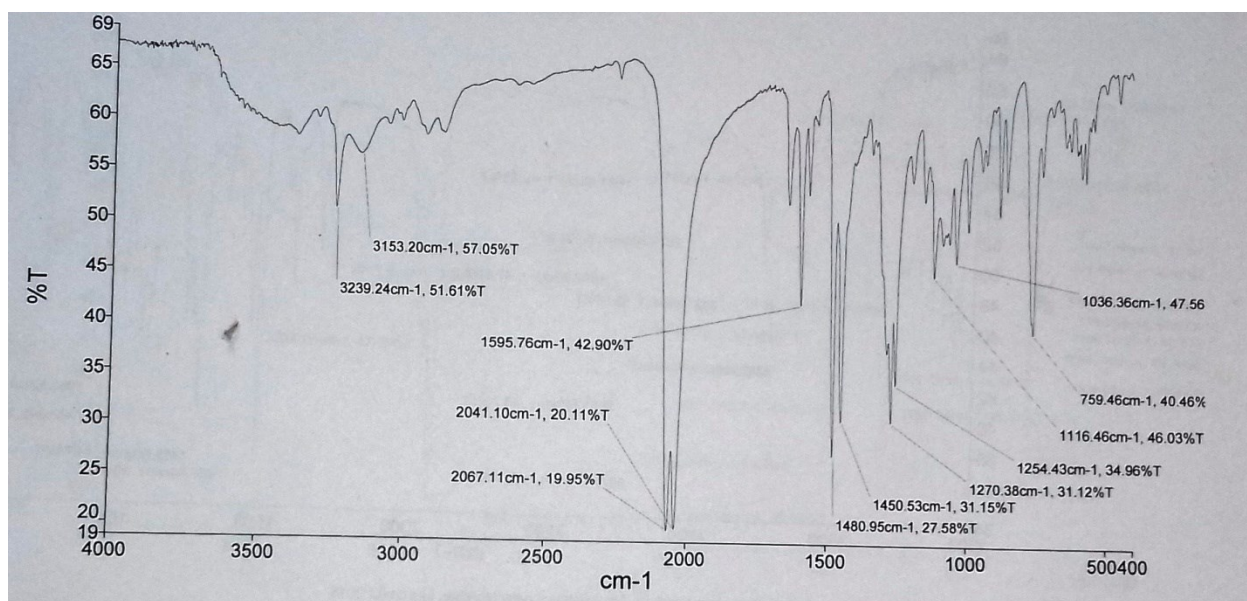

Fig. S1 IR Spectrum of complex 1

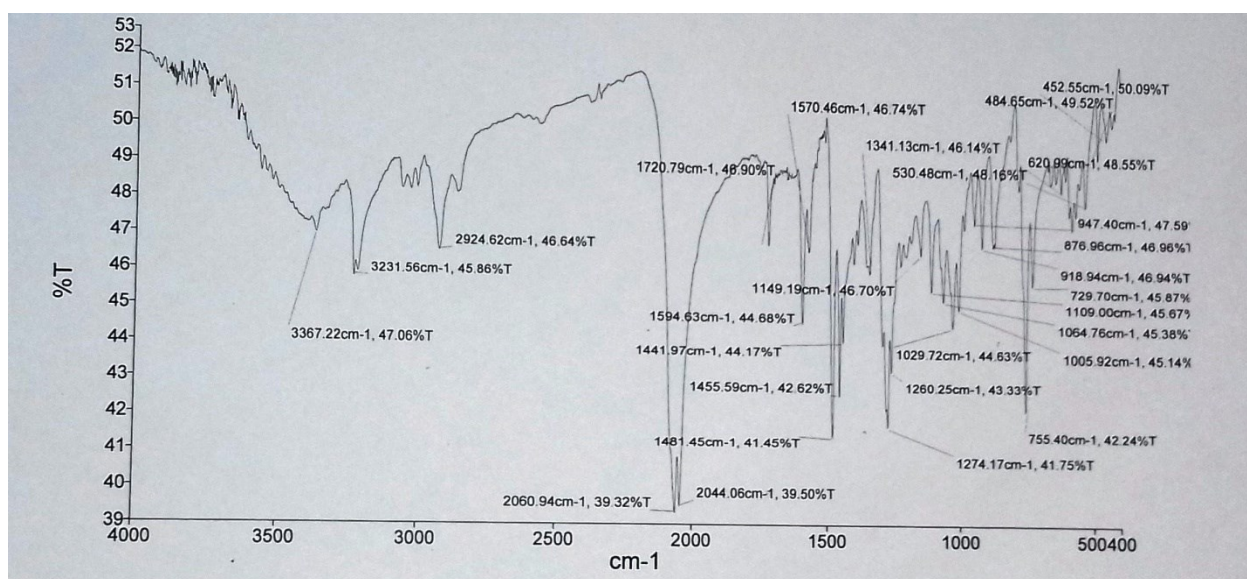

**Fig. S2** IR Spectrum of complex **2**

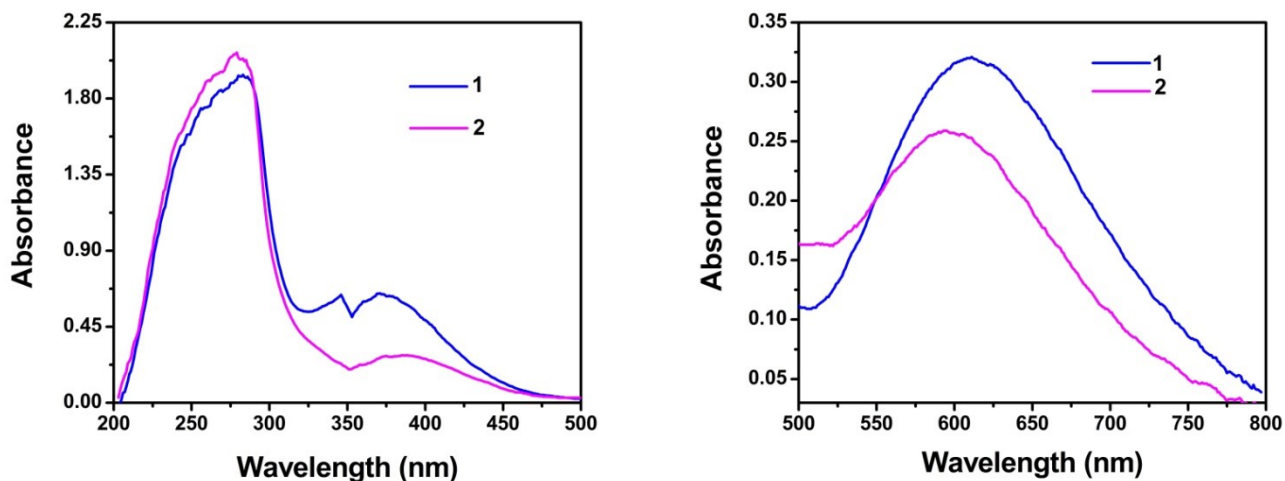

**Fig. S3** UV-Vis spectra of trinuclear complexes, **1** and **2** in acetonitrile solution (charge transfer band in the left and d-d transition band at the right side).

**Table S1**

Hydrogen bonds, distances Å, angles, deg.

A acceptor, D donor

| Atoms | D-H | A...H | D...A | D-H...A | Symmetry element |
|-------|-----|-------|-------|---------|------------------|
|-------|-----|-------|-------|---------|------------------|

In **1**

|              |         |         |           |         |                              |
|--------------|---------|---------|-----------|---------|------------------------------|
| N18-H18...N6 | 0.83(3) | 2.65(9) | 3.298(12) | 136(11) | $\frac{1}{2}+x, -1/2-y, 1-z$ |
|--------------|---------|---------|-----------|---------|------------------------------|

|               |  |         |         |           |         |
|---------------|--|---------|---------|-----------|---------|
| N39-H39...O1W |  | 0.85(3) | 2.33(7) | 3.097(11) | 151(12) |
|---------------|--|---------|---------|-----------|---------|

|              |  |         |         |           |         |                      |
|--------------|--|---------|---------|-----------|---------|----------------------|
| N43-H43...N3 |  | 0.84(3) | 2.55(4) | 3.378(10) | 169(12) | $-1/2+x, 1/2-y, 1-z$ |
|--------------|--|---------|---------|-----------|---------|----------------------|

In **2**

|                 |  |         |         |          |        |
|-----------------|--|---------|---------|----------|--------|
| N18A-H18A...N1B |  | 0.84(2) | 2.57(3) | 3.387(7) | 165(9) |
|-----------------|--|---------|---------|----------|--------|

|                 |  |         |         |          |         |
|-----------------|--|---------|---------|----------|---------|
| N22A-H22A...N1B |  | 0.83(2) | 2.34(3) | 3.168(7) | 171(10) |
|-----------------|--|---------|---------|----------|---------|

|                  |                                                   |
|------------------|---------------------------------------------------|
| N22A-H22A...N2B  | 0.83(2) 2.55(4) 3.346(6) 160(9)                   |
| N39A-H39A...N6A  | 0.84(2) 2.38(4) 3.194(9) 165(10) x, 1/2-y, z-1/2  |
| N43A-H43A...N6A  | 0.85(2) 2.43(4) 3.250(10) 164(10) x, 1/2-y, z-1/2 |
| N18B-H18B... N1A | 0.84(2) 2.42(4) 3.212(7) 158(9)                   |
| N22B-H22B...N1A  | 0.83(2) 2.61(4) 3.400(7) 159(9)                   |
| N39B-H39B...N6B  | 0.84(2) 2.36(6) 3.095(9) 146(10) x, 1/2-y, 1/2+z  |
| N43B-H43B...N6B  | 0.84(2) 2.55(5) 3.308(9) 151(9) x, 1/2-y, 1/2+z   |

---

## Table S2

### Cartesian Coordinates

#### 1A

|    |            |           |            |
|----|------------|-----------|------------|
| Zn | 0.0001740  | 5.5614798 | -0.0002059 |
| Cu | -2.0444944 | 7.2283358 | -1.1197446 |
| O  | -0.8297291 | 5.9161559 | -2.0253069 |
| O  | -2.1369702 | 5.6504683 | 0.1069147  |
| N  | -1.8608929 | 8.5204506 | -2.6146597 |
| N  | -3.2973229 | 8.2133204 | 0.0723734  |
| N  | 0.0413133  | 3.4755518 | -0.0470718 |
| N  | 0.2447072  | 2.7257014 | -0.9724824 |
| C  | -0.3346185 | 7.1697321 | -4.0162576 |
| C  | -2.8328382 | 5.4464703 | 1.2032814  |
| C  | -4.4152922 | 6.1580933 | 2.9347367  |
| H  | -5.0714547 | 6.9292237 | 3.3457884  |
| C  | -2.6996290 | 4.2119646 | 1.8857131  |
| H  | -1.9989513 | 3.4879768 | 1.4671776  |
| C  | -0.2068214 | 6.0175564 | -3.1752408 |
| C  | -1.1231672 | 8.3099214 | -3.6690349 |

|    |            |            |            |
|----|------------|------------|------------|
| C  | -3.7047758 | 6.4402460  | 1.7410687  |
| C  | -3.5094327 | 9.6360838  | -0.2015448 |
| H  | -2.6173451 | 10.1778709 | 0.1600881  |
| H  | -4.3718705 | 9.9994114  | 0.3831740  |
| C  | -3.4108622 | 3.9728104  | 3.0484877  |
| H  | -3.2778905 | 3.0233494  | 3.5693935  |
| C  | -4.2800427 | 4.9446170  | 3.5835790  |
| H  | -4.8248794 | 4.7477651  | 4.5062873  |
| C  | -3.7216808 | 9.9210567  | -1.6870334 |
| H  | -4.1404566 | 10.9341500 | -1.7867687 |
| H  | -4.4622323 | 9.2197162  | -2.1026061 |
| C  | 0.3854174  | 7.2168964  | -5.2398210 |
| H  | 0.2857798  | 8.1069885  | -5.8659158 |
| C  | -2.4315724 | 9.8700954  | -2.4963586 |
| H  | -2.6018343 | 10.2848026 | -3.5047423 |
| H  | -1.6809595 | 10.5108582 | -2.0003850 |
| C  | 0.6254163  | 4.9570985  | -3.6143477 |
| H  | 0.7128067  | 4.0733512  | -2.9849845 |
| C  | 1.3094690  | 5.0398124  | -4.8134270 |
| H  | 1.9516368  | 4.2104885  | -5.1127780 |
| C  | 1.2005716  | 6.1767966  | -5.6403071 |
| H  | 1.7524509  | 6.2335070  | -6.5780184 |
| C  | -3.8354274 | 7.7426475  | 1.1606769  |
| N  | 0.4693535  | 1.9674570  | -1.8257472 |
| H  | -4.4663108 | 8.4392374  | 1.7374495  |
| H  | -1.0751007 | 9.1311011  | -4.4047028 |
| Cu | 2.0445719  | 3.8947375  | 1.1199202  |
| O  | 0.8294348  | 5.2069260  | 2.0249056  |
| O  | 2.1375057  | 5.4724849  | -0.1068136 |
| N  | 1.8605895  | 2.6028989  | 2.6150498  |

|   |            |           |            |
|---|------------|-----------|------------|
| N | 3.2974573  | 2.9093908 | -0.0718059 |
| N | -0.0408703 | 7.6474059 | 0.0462092  |
| N | -0.2433788 | 8.3974646 | 0.9716503  |
| C | 0.3343017  | 3.9540290 | 4.0162419  |
| C | 2.8332265  | 5.6760459 | -1.2033737 |
| C | 4.4151644  | 4.9636411 | -2.9349731 |
| H | 5.0710575  | 4.1922549 | -3.3459720 |
| C | 2.7001798  | 6.9104276 | -1.8860549 |
| H | 1.9997408  | 7.6346711 | -1.4675650 |
| C | 0.2064866  | 5.1059196 | 3.1748467  |
| C | 1.1228303  | 2.8137321 | 3.6693458  |
| C | 3.7048117  | 4.6819335 | -1.7410970 |
| C | 3.5095211  | 1.4866783 | 0.2024669  |
| H | 2.6175215  | 0.9448027 | -0.1592537 |
| H | 4.3720826  | 1.1232466 | -0.3820050 |
| C | 3.4112911  | 7.1491658 | -3.0489934 |
| H | 3.2784592  | 8.0985492 | -3.5700780 |
| C | 4.2801249  | 6.1770243 | -3.5840343 |
| H | 4.8248217  | 6.3735324 | -4.5068972 |
| C | 3.7214662  | 1.2020167 | 1.6880437  |
| H | 4.1401823  | 0.1889269 | 1.7880808  |
| H | 4.4619728  | 1.9034134 | 2.1036001  |
| C | -0.3857249 | 3.9072515 | 5.2398221  |
| H | -0.2860292 | 3.0173923 | 5.8662377  |
| C | 2.4312042  | 1.2532007 | 2.4971077  |
| H | 2.6012625  | 0.8386827 | 3.5056013  |
| H | 1.6806580  | 0.6123850 | 2.0011055  |
| C | -0.6258802 | 6.1664519 | 3.6135277  |
| H | -0.7133664 | 7.0499414 | 2.9838084  |
| C | -1.3099559 | 6.0841021 | 4.8126183  |

|   |            |           |            |
|---|------------|-----------|------------|
| H | -1.9522026 | 6.9134755 | 5.1116614  |
| C | -1.2009486 | 4.9474403 | 5.6399305  |
| H | -1.7527868 | 4.8910534 | 6.5776856  |
| C | 3.8353930  | 3.3796816 | -1.1603620 |
| N | -0.4672121 | 9.1559229 | 1.8249336  |
| H | 4.4660948  | 2.6828434 | -1.7370333 |
| H | 1.0747003  | 1.9927379 | 4.4052150  |

**1B**

|    |            |           |            |
|----|------------|-----------|------------|
| Zn | 8.7771922  | 2.9059437 | 9.4960545  |
| Cu | 5.9215582  | 3.2760781 | 11.5024533 |
| Cu | 6.4527377  | 4.7850038 | 8.2370716  |
| N  | 8.5142061  | 0.9404655 | 9.3836356  |
| N  | 11.1458492 | 4.2696641 | 10.3520372 |
| O  | 6.0568122  | 2.8472656 | 9.5946989  |
| C  | 4.9475276  | 0.5935363 | 6.9846076  |
| H  | 5.3568336  | 0.1152733 | 6.0929529  |
| O  | 7.6946122  | 5.3525053 | 9.6229077  |
| O  | 8.0459172  | 3.7040690 | 7.7058044  |
| C  | 6.2985874  | 3.9773246 | 5.4361854  |
| O  | 7.8965929  | 3.0501751 | 11.4656988 |
| C  | 8.2423845  | 3.4405083 | 4.0527090  |
| H  | 7.5930133  | 3.5532819 | 3.1810821  |
| C  | 10.5041470 | 2.7764555 | 14.7008514 |
| H  | 11.2196354 | 2.7458347 | 15.5217034 |
| N  | 11.6956611 | 4.9507069 | 11.1169204 |
| N  | 5.6208206  | 4.3439365 | 6.4861248  |
| N  | 5.9995348  | 4.0385214 | 13.3253161 |
| N  | 3.9178987  | 3.1583168 | 11.3365894 |
| C  | 5.2822239  | 2.0239109 | 8.9254599  |

|   |            |           |            |
|---|------------|-----------|------------|
| C | 8.5064766  | 6.2157616 | 11.6504992 |
| H | 9.4713253  | 5.7526147 | 11.4491498 |
| C | 8.3370516  | 3.4444255 | 13.7975192 |
| C | 3.1014814  | 0.9675479 | 8.4814457  |
| H | 2.0625437  | 0.8052341 | 8.7787604  |
| N | 7.6731185  | 0.4806566 | 10.1203635 |
| C | 3.9196480  | 1.7893262 | 9.2977090  |
| C | 3.5309718  | 5.6016052 | 7.0149633  |
| H | 4.0110403  | 6.5224785 | 6.6487164  |
| H | 2.4735116  | 5.6416331 | 6.7119471  |
| C | 6.1866858  | 6.6426971 | 10.9915412 |
| C | 7.4628420  | 6.0435647 | 10.6996364 |
| N | 4.9280861  | 5.7352496 | 9.0809143  |
| C | 9.9177937  | 2.2229724 | 12.4034642 |
| H | 10.1640448 | 1.7538691 | 11.4516049 |
| C | 9.8755170  | 3.1341129 | 6.3082451  |
| H | 10.5020967 | 3.0316608 | 7.1954674  |
| C | 9.2752294  | 3.3860778 | 14.8589257 |
| H | 8.9993872  | 3.8282684 | 15.8192074 |
| C | 10.3760235 | 2.9210028 | 5.0339044  |
| H | 11.4215853 | 2.6299037 | 4.9185526  |
| C | 3.3307332  | 2.4256589 | 10.4305123 |
| C | 7.6948035  | 3.6775154 | 5.3390990  |
| C | 6.0337725  | 7.4222350 | 12.1694681 |
| H | 5.0660108  | 7.8965403 | 12.3558158 |
| C | 5.0347723  | 6.4365497 | 10.1749404 |
| C | 8.6834802  | 2.9022660 | 12.5210383 |
| N | 10.6199873 | 3.5559083 | 9.5347436  |
| C | 8.5281745  | 3.5225011 | 6.4926516  |
| C | 9.5655062  | 3.0752544 | 3.8909723  |

|   |            |            |            |
|---|------------|------------|------------|
| H | 9.9747966  | 2.9025247  | 2.8960889  |
| C | 5.7718331  | 1.3960377  | 7.7525466  |
| H | 6.8161256  | 1.5592836  | 7.4988878  |
| C | 10.8086113 | 2.1794454  | 13.4633109 |
| H | 11.7638049 | 1.6702302  | 13.3278376 |
| C | 7.0645745  | 4.0246410  | 14.0753741 |
| C | 7.0657384  | 7.5749595  | 13.0719469 |
| H | 6.9311868  | 8.1706701  | 13.9745896 |
| C | 3.0370908  | 3.8552070  | 12.2754158 |
| H | 2.9515644  | 4.9039529  | 11.9335114 |
| H | 2.0241285  | 3.4174712  | 12.2296621 |
| C | 3.5980981  | 0.3756289  | 7.3357858  |
| H | 2.9628574  | -0.2608706 | 6.7205047  |
| C | 8.3064535  | 6.9538793  | 12.7995819 |
| H | 9.1309949  | 7.0562138  | 13.5074925 |
| C | 4.8148886  | 4.6883449  | 13.8858305 |
| H | 4.9848426  | 4.9030826  | 14.9544505 |
| H | 4.6873026  | 5.6589891  | 13.3787798 |
| C | 4.1642522  | 4.3798611  | 6.3534192  |
| H | 3.8883482  | 4.3408883  | 5.2852318  |
| H | 3.7706094  | 3.4609397  | 6.8250628  |
| C | 3.5808325  | 5.5549332  | 8.5395940  |
| H | 3.2184044  | 4.5675730  | 8.8747141  |
| H | 2.9047757  | 6.3176243  | 8.9658272  |
| C | 3.5501613  | 3.8519918  | 13.7104867 |
| H | 2.7630769  | 4.2755183  | 14.3530361 |
| H | 3.7291846  | 2.8190608  | 14.0465313 |
| N | 6.8582031  | 0.0236837  | 10.8116957 |
| H | 5.7309011  | 3.8489855  | 4.4993595  |
| H | 6.9739390  | 4.4878173  | 15.0707819 |



|   |           |           |            |
|---|-----------|-----------|------------|
| H | 2.2383547 | 2.2990527 | 10.5225734 |
| H | 4.1109178 | 6.9087102 | 10.5524460 |

**1A'**

|    |            |            |            |
|----|------------|------------|------------|
| Zn | -0.0188888 | 5.5769377  | 0.1957600  |
| Cu | -1.8621141 | 7.3979889  | -0.8917338 |
| O  | -0.8624223 | 5.9518655  | -1.8185967 |
| O  | -2.1141649 | 5.9235430  | 0.3910761  |
| N  | -1.3151658 | 8.7105700  | -2.3379280 |
| N  | -3.1575222 | 8.5109747  | 0.2399830  |
| N  | -0.2330090 | 3.4510446  | 0.1615885  |
| N  | -0.0222159 | 2.7134188  | -0.7686032 |
| C  | -0.5963016 | 6.9899939  | -3.9757740 |
| C  | -3.0934730 | 5.6988345  | 1.2680794  |
| C  | -5.2179007 | 6.2834258  | 2.2945061  |
| H  | -6.0857743 | 6.9456691  | 2.3513085  |
| C  | -3.0027308 | 4.6002554  | 2.1456228  |
| H  | -2.1236320 | 3.9620050  | 2.0616230  |
| C  | -0.3030777 | 5.9717257  | -3.0311854 |
| C  | -1.6061886 | 8.0548351  | -3.6543487 |
| C  | -4.2329388 | 6.5412889  | 1.3321465  |
| C  | -3.3888430 | 9.9119668  | -0.1837408 |
| H  | -2.6304904 | 10.5234243 | 0.3279693  |
| H  | -4.3770875 | 10.2418640 | 0.1798911  |
| C  | -4.0006986 | 4.3596099  | 3.0831255  |
| H  | -3.9000235 | 3.5126319  | 3.7637113  |
| C  | -5.1146800 | 5.2032385  | 3.1717345  |
| H  | -5.8913209 | 5.0229780  | 3.9149331  |
| C  | -3.2856948 | 10.1350852 | -1.6940864 |
| H  | -3.7032085 | 11.1273804 | -1.9241620 |

|    |            |            |            |
|----|------------|------------|------------|
| H  | -3.9065788 | 9.4035302  | -2.2360546 |
| C  | 0.0561582  | 6.9873786  | -5.2168441 |
| H  | -0.1620438 | 7.7888216  | -5.9277164 |
| C  | -1.8433513 | 10.0880815 | -2.2038345 |
| H  | -1.7635019 | 10.6033729 | -3.1768714 |
| H  | -1.1916824 | 10.6176125 | -1.4935559 |
| C  | 0.5979042  | 4.9516267  | -3.4014733 |
| H  | 0.8001671  | 4.1618273  | -2.6817963 |
| C  | 1.2131246  | 4.9559354  | -4.6459898 |
| H  | 1.9188662  | 4.1621131  | -4.8934511 |
| C  | 0.9596748  | 5.9838286  | -5.5624422 |
| H  | 1.4594786  | 6.0020486  | -6.5307540 |
| C  | -4.3986953 | 7.6817977  | 0.3629842  |
| N  | 0.2370659  | 1.9750962  | -1.6360629 |
| H  | -5.2306335 | 8.3239102  | 0.7003253  |
| H  | -2.6269346 | 7.6421850  | -3.5958535 |
| Cu | 1.9783989  | 3.7826901  | 0.9664558  |
| O  | 1.0222433  | 5.1370984  | 2.0960247  |
| O  | 2.0694188  | 5.3699294  | -0.1829648 |
| N  | 1.7062799  | 2.3721150  | 2.4072555  |
| N  | 3.0446710  | 2.7466425  | -0.4529671 |
| N  | 0.1560630  | 7.7146654  | 0.3271958  |
| N  | -0.2890493 | 8.3529951  | 1.2480932  |
| C  | 0.9538957  | 3.9300928  | 4.1705816  |
| C  | 2.8499221  | 5.6514149  | -1.2269959 |
| C  | 4.6459344  | 5.1011087  | -2.7643671 |
| H  | 5.4416785  | 4.4200409  | -3.0777484 |
| C  | 2.6270544  | 6.8381205  | -1.9543795 |
| H  | 1.8261397  | 7.4892681  | -1.6036398 |
| C  | 0.4834737  | 4.9509406  | 3.3011749  |

|   |            |           |            |
|---|------------|-----------|------------|
| C | 2.0590977  | 3.0204020 | 3.7174166  |
| C | 3.9018463  | 4.7889232 | -1.6186940 |
| C | 3.3616492  | 1.3358929 | -0.1242735 |
| H | 2.5022865  | 0.7362855 | -0.4603137 |
| H | 4.2389607  | 1.0159236 | -0.7132184 |
| C | 3.3906558  | 7.1344071 | -3.0755082 |
| H | 3.1819141  | 8.0424064 | -3.6432007 |
| C | 4.3981110  | 6.2594698 | -3.5004691 |
| H | 4.9817344  | 6.4769348 | -4.3947668 |
| C | 3.6111073  | 1.0887440 | 1.3656983  |
| H | 4.1249333  | 0.1214958 | 1.4752566  |
| H | 4.2917607  | 1.8527945 | 1.7751095  |
| C | 0.3634261  | 3.7701270 | 5.4301679  |
| H | 0.7237808  | 2.9724370 | 6.0854276  |
| C | 2.3180903  | 1.0391567 | 2.1820975  |
| H | 2.4998591  | 0.5555910 | 3.1569957  |
| H | 1.5804762  | 0.4260880 | 1.6440804  |
| C | -0.5587255 | 5.7899418 | 3.7458089  |
| H | -0.9155796 | 6.5721347 | 3.0763020  |
| C | -1.1147355 | 5.6249494 | 5.0084443  |
| H | -1.9262619 | 6.2838625 | 5.3201530  |
| C | -0.6634014 | 4.6106002 | 5.8612918  |
| H | -1.1097623 | 4.4729748 | 6.8461175  |
| C | 4.2423165  | 3.5784494 | -0.7931649 |
| N | -0.7697007 | 8.9881643 | 2.1030824  |
| H | 4.9689476  | 2.9564298 | -1.3439857 |
| H | 3.0079824  | 3.5624427 | 3.5738314  |
| H | -1.6030150 | 8.8185642 | -4.4513972 |
| H | -0.2948899 | 8.7302397 | -2.2209708 |
| H | -2.6975482 | 8.5453168 | 1.1663692  |

|   |            |           |            |
|---|------------|-----------|------------|
| H | -4.6583216 | 7.3187811 | -0.6462429 |
| H | 2.2300870  | 2.2394831 | 4.4766521  |
| H | 4.7183479  | 3.8683084 | 0.1594470  |
| H | 2.4174181  | 2.7319927 | -1.2721360 |
| H | 0.6831165  | 2.2794548 | 2.3833224  |

**1B'**

|    |            |           |            |
|----|------------|-----------|------------|
| Zn | 7.9922802  | 3.4371560 | 9.6892327  |
| Cu | 6.3074229  | 2.9987453 | 12.4469687 |
| Cu | 6.2877223  | 4.8390193 | 7.3056118  |
| N  | 8.1080680  | 1.3241378 | 9.8784304  |
| N  | 10.0097279 | 5.3428551 | 10.3089817 |
| O  | 5.9463572  | 3.1907068 | 10.5124184 |
| C  | 3.6470523  | 2.4170767 | 7.7900140  |
| H  | 3.6869089  | 2.0573184 | 6.7589843  |
| O  | 6.8042110  | 5.3585356 | 9.1046002  |
| O  | 7.5946339  | 3.3418483 | 7.5930939  |
| C  | 6.5595637  | 2.9747693 | 5.0367768  |
| O  | 8.1522625  | 3.5457996 | 11.9000493 |
| C  | 8.8573567  | 2.1554293 | 4.3765566  |
| H  | 8.4872788  | 1.9982268 | 3.3599056  |
| C  | 11.5555987 | 2.3636076 | 13.9967144 |
| H  | 12.4502590 | 2.0760916 | 14.5492549 |
| N  | 10.3793736 | 6.1142906 | 11.0972864 |
| N  | 6.2608092  | 4.4317021 | 5.2650884  |
| N  | 6.9319087  | 2.7748001 | 14.3926532 |
| N  | 4.2729978  | 2.7476867 | 12.7707647 |
| C  | 4.8179266  | 2.9884719 | 9.8588234  |
| C  | 6.7139755  | 6.2423322 | 11.2940664 |
| H  | 7.7279471  | 5.8786002 | 11.4510712 |

|   |            |           |            |
|---|------------|-----------|------------|
| C | 9.2973760  | 3.2548459 | 13.9682961 |
| C | 2.3843402  | 3.1237153 | 9.7145522  |
| H | 1.4270071  | 3.3452362 | 10.1933891 |
| N | 7.5536390  | 0.9699533 | 10.8734523 |
| C | 3.5582396  | 3.2609411 | 10.4615934 |
| C | 4.6168713  | 6.2751947 | 4.8172184  |
| H | 5.4795450  | 6.9612976 | 4.7603716  |
| H | 3.9176997  | 6.5971815 | 4.0308264  |
| C | 4.7787855  | 6.4642098 | 9.8374984  |
| C | 6.1080464  | 6.0088000 | 10.0369635 |
| N | 4.8229270  | 6.3168856 | 7.3265301  |
| C | 10.3658283 | 2.5924811 | 11.8902502 |
| H | 10.3284752 | 2.4788350 | 10.8093859 |
| C | 9.7830237  | 2.5512418 | 6.9878243  |
| H | 10.1361132 | 2.7287619 | 8.0014300  |
| C | 10.4400800 | 2.8636245 | 14.6697721 |
| H | 10.4543941 | 2.9597982 | 15.7585555 |
| C | 10.6267653 | 2.0347011 | 6.0090073  |
| H | 11.6567780 | 1.7891341 | 6.2730994  |
| C | 3.5278872  | 3.7052755 | 11.8900877 |
| C | 7.9859911  | 2.6557081 | 5.3492606  |
| C | 4.1151396  | 7.1378070 | 10.8742578 |
| H | 3.0926250  | 7.4852606 | 10.7023405 |
| C | 4.0259716  | 6.1491123 | 8.5797431  |
| C | 9.2466992  | 3.1374133 | 12.5546390 |
| N | 9.6503536  | 4.5563333 | 9.4674023  |
| C | 8.4458146  | 2.8704611 | 6.6743812  |
| C | 10.1782150 | 1.8375581 | 4.6965792  |
| H | 10.8482512 | 1.4379003 | 3.9352769  |
| C | 4.8299503  | 2.5227741 | 8.5203412  |

|   |            |           |            |
|---|------------|-----------|------------|
| H | 5.7923822  | 2.2325739 | 8.1019099  |
| C | 11.5033561 | 2.2304220 | 12.6043586 |
| H | 12.3624278 | 1.8285490 | 12.0643597 |
| C | 8.0662689  | 3.7240142 | 14.6699731 |
| C | 4.7145510  | 7.3463612 | 12.1151221 |
| H | 4.1784048  | 7.8705536 | 12.9064410 |
| C | 3.7712076  | 2.7971647 | 14.1593979 |
| H | 3.7293870  | 3.8590313 | 14.4481950 |
| H | 2.7352604  | 2.4132746 | 14.1909392 |
| C | 2.4126844  | 2.7321290 | 8.3717844  |
| H | 1.4865275  | 2.6394928 | 7.8046361  |
| C | 6.0249716  | 6.8872594 | 12.3130230 |
| H | 6.5250180  | 7.0496432 | 13.2701582 |
| C | 5.9385522  | 2.7850449 | 15.4860010 |
| H | 6.3957324  | 2.3670020 | 16.4007076 |
| H | 5.7017830  | 3.8395680 | 15.6986967 |
| C | 5.0550248  | 4.8455738 | 4.5120404  |
| H | 5.2361332  | 4.7204710 | 3.4292610  |
| H | 4.2515387  | 4.1452744 | 4.7888221  |
| C | 3.9125602  | 6.4118734 | 6.1629114  |
| H | 3.1783010  | 5.5982043 | 6.2746549  |
| H | 3.3514298  | 7.3622351 | 6.2111078  |
| C | 4.6560046  | 2.0339007 | 15.1408867 |
| H | 4.0878597  | 1.8735446 | 16.0697537 |
| H | 4.8950845  | 1.0339539 | 14.7417272 |
| N | 6.9879615  | 0.6794804 | 11.8665262 |
| H | 5.8683058  | 2.4169475 | 5.6866240  |
| H | 8.2440183  | 3.7761207 | 15.7572561 |
| H | 4.0036796  | 4.6912353 | 12.0155819 |
| H | 3.6755014  | 5.1061147 | 8.5727796  |

|   |           |           |            |
|---|-----------|-----------|------------|
| H | 6.3332889 | 2.7177722 | 3.9882328  |
| H | 7.0669126 | 4.9533878 | 4.8950126  |
| H | 3.1296052 | 6.7922346 | 8.5263285  |
| H | 2.4816137 | 3.7855574 | 12.2322782 |
| H | 7.3329488 | 1.8289481 | 14.3096139 |
| H | 7.7402618 | 4.7143970 | 14.3169411 |
| H | 4.1311375 | 1.7976657 | 12.4017453 |
| H | 5.3564550 | 7.1916935 | 7.4070223  |

## 2

|    |           |            |            |
|----|-----------|------------|------------|
| Zn | 5.5266852 | -0.0608256 | 21.6062081 |
| Cu | 4.9796924 | -2.9095575 | 20.3597498 |
| Cu | 3.0493793 | 1.3359675  | 20.3954075 |
| O  | 4.9955613 | 1.7431046  | 20.5231668 |
| O  | 5.5700386 | -1.0662427 | 19.8248076 |
| O  | 5.3134880 | -2.1005569 | 22.1516440 |
| O  | 3.5091283 | 0.1653216  | 21.9406632 |
| N  | 5.2180357 | -3.5733356 | 18.3770140 |
| H  | 6.1802174 | -3.9186508 | 18.2701585 |
| N  | 4.5905310 | -4.7595544 | 21.2026386 |
| H  | 5.4843666 | -5.2320445 | 21.3881056 |
| N  | 2.5256726 | -1.5031517 | 19.6152160 |
| N  | 1.0965884 | 1.6864106  | 21.1026616 |
| H  | 1.0996356 | 2.5582855  | 21.6452375 |
| N  | 7.1101727 | 1.6264811  | 23.1989883 |
| N  | 2.9383552 | 2.4606428  | 18.6903508 |
| H  | 3.1400264 | 3.4367303  | 18.9417447 |
| C  | 5.5888484 | -2.7747815 | 23.2709398 |
| C  | 6.2097354 | -1.4507494 | 17.5699999 |
| N  | 2.7688841 | -2.5814695 | 20.0362383 |

|   |           |            |            |
|---|-----------|------------|------------|
| C | 5.7298739 | 2.4629722  | 19.6678366 |
| C | 4.9295883 | -4.0026227 | 23.5344308 |
| C | 3.7582809 | 0.2791998  | 24.3232145 |
| H | 4.8302849 | 0.0959174  | 24.2299000 |
| C | 1.5770791 | 0.5627765  | 23.2766207 |
| N | 7.0619887 | 0.5552898  | 22.6327056 |
| C | 4.3615415 | -5.8607101 | 18.9624407 |
| H | 3.8168663 | -6.6931496 | 18.4915801 |
| H | 5.4086093 | -6.2004610 | 19.0571231 |
| C | 5.3631676 | 2.5910730  | 18.3026075 |
| C | 6.4331125 | -0.8346844 | 18.8254618 |
| C | 7.0675192 | -1.1682623 | 16.5025360 |
| H | 6.8863230 | -1.6447236 | 15.5353354 |
| C | 8.1340372 | -0.2784570 | 16.6539561 |
| H | 8.7821175 | -0.0491231 | 15.8079275 |
| C | 2.9726569 | 0.3385691  | 23.1566381 |
| N | 2.2999485 | -0.4216716 | 19.1859857 |
| C | 6.5223072 | -2.2837587 | 24.2065295 |
| H | 7.0225224 | -1.3401878 | 23.9792387 |
| C | 7.5425579 | 0.0148254  | 18.9877500 |
| H | 7.7239684 | 0.4586366  | 19.9677619 |
| C | 3.9374184 | -4.5054604 | 22.5323954 |
| H | 3.4732151 | -5.4396913 | 22.8929560 |
| H | 3.1433117 | -3.7687803 | 22.3381072 |
| C | 3.7540875 | -5.6250853 | 20.3440190 |
| H | 3.5846111 | -6.5926720 | 20.8512228 |
| H | 2.7830931 | -5.1195617 | 20.2451584 |
| C | 5.2200450 | -4.7057712 | 24.7076197 |
| H | 4.7069169 | -5.6521782 | 24.8989315 |
| C | 4.2764683 | -4.6585516 | 18.0240166 |



|   |            |            |            |
|---|------------|------------|------------|
| H | 4.4565170  | -4.9802375 | 16.9816053 |
| H | 3.2687394  | -4.2212841 | 18.0758310 |
| C | 3.1737083  | 0.4387677  | 25.5766798 |
| H | 3.8013263  | 0.3827866  | 26.4671080 |
| C | 5.0609421  | -2.4031326 | 17.4472741 |
| H | 4.9801938  | -2.7698302 | 16.4090199 |
| H | 4.1107399  | -1.9215592 | 17.7189145 |
| C | 4.0752575  | 1.9834880  | 17.8325534 |
| H | 4.0772996  | 0.8839000  | 17.8969100 |
| H | 3.8863482  | 2.2655414  | 16.7830763 |
| C | 1.0160449  | 0.7422486  | 24.5445733 |
| H | -0.0599168 | 0.9185829  | 24.6264852 |
| C | 0.4824914  | 2.8245879  | 18.9392528 |
| H | 0.7171101  | 3.7968228  | 19.4085695 |
| H | -0.4077100 | 2.9987480  | 18.3155896 |
| C | 6.7753628  | -2.9904640 | 25.3793883 |
| H | 7.4936569  | -2.5903418 | 26.0974950 |
| C | 0.7374137  | 0.5692357  | 22.0349706 |
| H | -0.3320614 | 0.6394552  | 22.3020093 |
| H | 0.8895470  | -0.3548724 | 21.4574475 |
| C | 8.3667243  | 0.3054370  | 17.9046211 |
| H | 9.1958002  | 1.0006409  | 18.0403671 |
| C | 6.1326345  | -4.2070858 | 25.6397868 |
| H | 6.3404945  | -4.7599596 | 26.5560911 |
| C | 6.9042049  | 3.1027826  | 20.1171579 |
| H | 7.1563455  | 3.0418653  | 21.1746482 |
| C | 7.7268974  | 3.7800483  | 19.2216105 |
| H | 8.6407396  | 4.2498877  | 19.5896791 |
| C | 6.1986642  | 3.2894514  | 17.4256215 |
| H | 5.9123747  | 3.3673153  | 16.3736991 |

|   |            |           |            |
|---|------------|-----------|------------|
| C | 0.1069284  | 1.7960758 | 20.0068645 |
| H | -0.8878148 | 2.0351860 | 20.4262900 |
| H | 0.0498368  | 0.7992024 | 19.5467898 |
| C | 1.6256068  | 2.3950875 | 18.0182306 |
| H | 1.4851050  | 1.3523880 | 17.7016232 |
| H | 1.6436574  | 3.0308998 | 17.1144272 |
| N | 7.2217068  | 2.6385736 | 23.7530043 |
| C | 7.3902210  | 3.8675014 | 17.8657149 |
| H | 8.0375053  | 4.3950319 | 17.1649021 |
| C | 1.8006011  | 0.6792811 | 25.6987507 |
| H | 1.3468946  | 0.8138265 | 26.6807194 |

**2'**

|    |           |            |            |
|----|-----------|------------|------------|
| Zn | 5.8076288 | -0.0550072 | 21.4748158 |
| Cu | 4.8459946 | -2.9395587 | 20.6043905 |
| Cu | 3.3349271 | 1.3830778  | 20.0761022 |
| O  | 5.3058233 | 1.6382914  | 20.1199343 |
| O  | 5.8263025 | -1.3254288 | 19.9000819 |
| O  | 5.5397733 | -2.1026023 | 22.2593562 |
| O  | 3.8296045 | 0.3734810  | 21.7334217 |
| N  | 4.6466113 | -3.6444651 | 18.7396738 |
| N  | 4.1998544 | -4.5110942 | 21.6152782 |
| N  | 2.7731982 | -1.3380389 | 19.4726696 |
| N  | 1.3949258 | 1.2048390  | 20.5497428 |
| N  | 6.9095095 | 1.7670655  | 23.2309822 |
| N  | 3.1679862 | 2.6406045  | 18.5603377 |
| C  | 5.8401573 | -2.7005254 | 23.3940121 |
| C  | 6.0671211 | -1.9796090 | 17.6045812 |
| N  | 2.6447088 | -2.1886853 | 20.2897519 |
| C  | 5.9839007 | 2.6682495  | 19.6599069 |

|   |           |            |            |
|---|-----------|------------|------------|
| C | 5.3154792 | -3.9878210 | 23.7387499 |
| C | 3.7542134 | -0.1474510 | 24.0454483 |
| H | 4.8419252 | -0.1923497 | 24.0642869 |
| C | 1.6958241 | 0.3074885  | 22.8237167 |
| N | 7.1341029 | 0.7139643  | 22.6612701 |
| C | 3.7079305 | -5.8127318 | 19.5553732 |
| H | 3.0486997 | -6.6249223 | 19.2122849 |
| H | 4.7274828 | -6.2249817 | 19.6180525 |
| C | 5.4392668 | 3.5659917  | 18.6851633 |
| C | 6.4049924 | -1.1594934 | 18.7211018 |
| C | 6.6487028 | -1.6986781 | 16.3458787 |
| H | 6.3621795 | -2.3192598 | 15.4936012 |
| C | 7.5636539 | -0.6721908 | 16.1785252 |
| H | 7.9981007 | -0.4708223 | 15.1998691 |
| C | 3.1175225 | 0.1889149  | 22.8323803 |
| N | 2.9396165 | -0.4713342 | 18.6799534 |
| C | 6.6901282 | -2.0549810 | 24.3252537 |
| H | 7.1106579 | -1.0901221 | 24.0336249 |
| C | 7.3716149 | -0.1501298 | 18.5411043 |
| H | 7.6583540 | 0.4481372  | 19.4046310 |
| C | 4.4782707 | -4.7514679 | 22.8591140 |
| C | 3.2337205 | -5.3739137 | 20.9423812 |
| H | 3.0219765 | -6.2561916 | 21.5719455 |
| H | 2.3020358 | -4.7928328 | 20.8382497 |
| C | 5.6131399 | -4.5391161 | 25.0090652 |
| H | 5.1909990 | -5.5148361 | 25.2626494 |
| C | 3.6492999 | -4.6963844 | 18.5156200 |
| H | 3.7778111 | -5.1144126 | 17.5019474 |
| H | 2.6577825 | -4.2165534 | 18.5642935 |
| C | 3.0178917 | -0.4269147 | 25.1862368 |

|   |            |            |            |
|---|------------|------------|------------|
| H | 3.5453565  | -0.7001885 | 26.1015245 |
| C | 5.1502020  | -3.0833454 | 17.6834961 |
| C | 4.1130378  | 3.4313496  | 18.1553188 |
| H | 3.8860177  | 4.0831721  | 17.2945391 |
| C | 0.9727750  | 0.0076293  | 24.0025149 |
| H | -0.1170080 | 0.0809937  | 23.9750003 |
| C | 0.6839616  | 2.6858685  | 18.6682566 |
| H | 0.7607528  | 3.5597515  | 19.3345200 |
| H | -0.1830501 | 2.8526004  | 18.0108160 |
| C | 6.9670182  | -2.6320981 | 25.5545840 |
| H | 7.6231424  | -2.1052662 | 26.2501191 |
| C | 0.9505488  | 0.7073301  | 21.6632525 |
| H | -0.1418204 | 0.5822248  | 21.7531366 |
| C | 7.9288089  | 0.0982355  | 17.2958634 |
| H | 8.6546678  | 0.9063433  | 17.1919763 |
| C | 6.4232744  | -3.8793461 | 25.9155979 |
| H | 6.6438493  | -4.3209397 | 26.8869684 |
| C | 7.3090867  | 2.9010788  | 20.1043972 |
| H | 7.7153171  | 2.2290532  | 20.8603635 |
| C | 8.0610303  | 3.9498655  | 19.6006132 |
| H | 9.0755129  | 4.1003307  | 19.9740876 |
| C | 6.2431247  | 4.6185528  | 18.1835057 |
| H | 5.8133024  | 5.2844813  | 17.4310330 |
| C | 0.4163586  | 1.4210532  | 19.4810815 |
| H | -0.5992667 | 1.4544661  | 19.9124894 |
| H | 0.4736359  | 0.5474662  | 18.8099429 |
| C | 1.9307394  | 2.5875665  | 17.7876745 |
| H | 1.9239784  | 1.6194841  | 17.2595872 |
| H | 1.9297944  | 3.3930593  | 17.0316418 |
| N | 6.7636253  | 2.7641760  | 23.7972305 |

|   |           |            |            |
|---|-----------|------------|------------|
| C | 7.5373171 | 4.8210019  | 18.6275718 |
| H | 8.1369859 | 5.6422327  | 18.2363584 |
| C | 1.6132142 | -0.3620058 | 25.1733817 |
| H | 1.0393310 | -0.5877942 | 26.0716245 |
| H | 4.8623290 | -3.5085727 | 16.7071431 |
| H | 4.0249381 | -5.6506483 | 23.3090297 |
